# Supplementary material for: Comparative proteomics of soluble factors secreted by human breast adipose tissue from tumor and normal breast
Source: PubMed Central journal article supplement (PMC6089553; doi:10.18632/oncotarget.25749), 2018-07-24
Supplement: oncotarget-09-31007-s001.pdf [file oncotarget-09-31007-s001.pdf]

## **Comparative proteomics of soluble factors secreted by human breast adipose tissue from tumor and normal breast**

### **SUPPLEMENTARY MATERIALS**

#### **Supplementary Table 1: Proteins detected for 3 hATT-CMs**

See Supplementary Table 1 in Supplementary Files

#### **Supplementary Table 2: Proteins detected for 3 hATN-CMs**

See Supplementary Table 2 in Supplementary Files

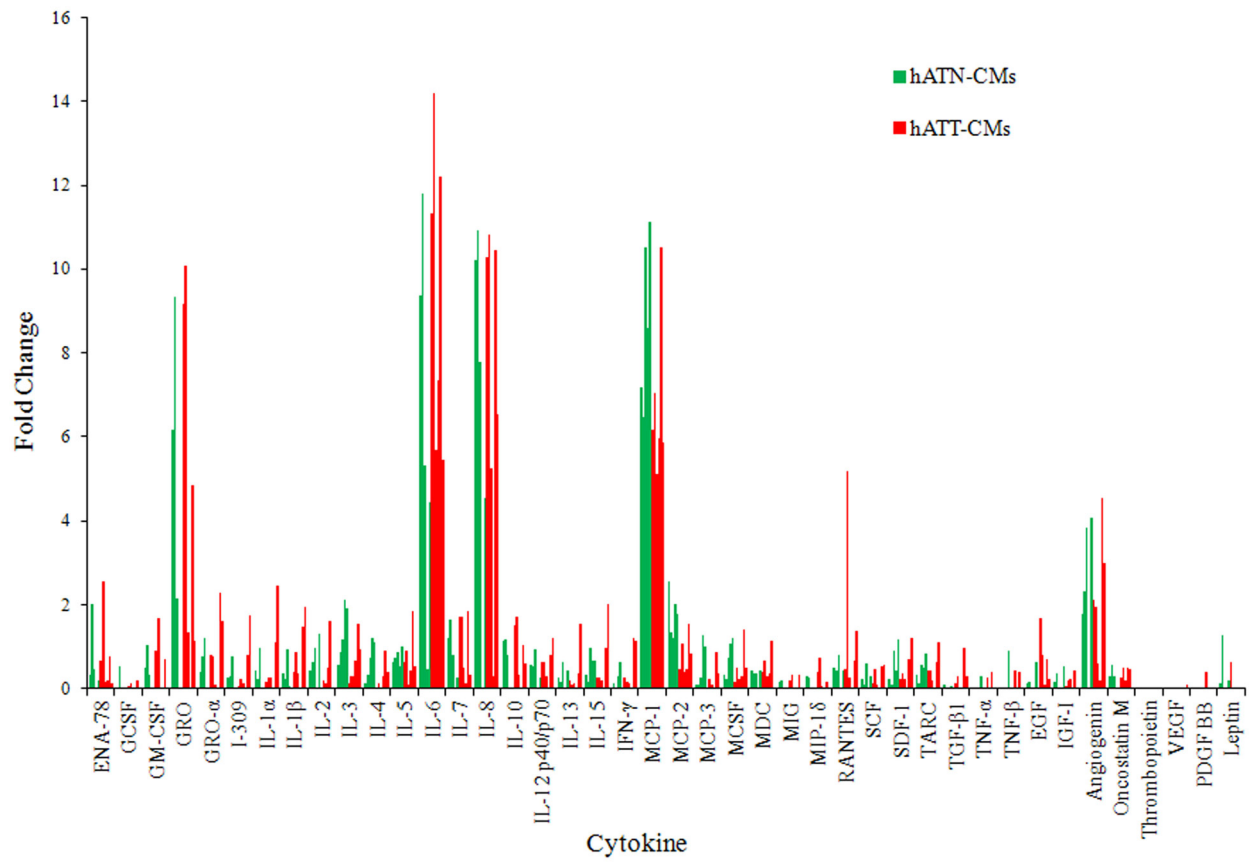

**Supplementary Figure 1: Array of 42 cytokines.** Dots from the array were measured by densitometry and relativized to control membrane. Bar chart shows relative fold change for each cytokines of hATN-CMs (n=5) and hATT- CMs (n=6).
